# Supplementary material
Source: PubMed Central journal article supplement (PMC4884307)
Supplement: NIHMS774512-supplement-1.pdf [file NIHMS774512-supplement-1.pdf]

Supplemental Figures

**Figure 1. Hazard Ratios for Cholesterol Efflux Capacity Adjusted for Coronary Calcium and Family History**

Hazard ratios for 1 standard deviation increase in cholesterol efflux derived from Cox proportional hazards models for incident ASCVD and adjusted for traditional risk factors, including age, sex, race, diabetes, systolic blood pressure, smoking, body mass index, total cholesterol level, HDL-C, anti-hypertensive medication, and statin medication.

**TRF:** Traditional risk factors; **CAC:** Coronary artery calcium; **FH:** Family history of myocardial infarction.

**Figure 2. Hazard Ratios for Cholesterol Efflux Capacity Among Participants with Prevalent Coronary Calcium, Family History, or Elevated Hs-CRP**

Hazard ratios for 1 standard deviation increase in cholesterol efflux derived from Cox proportional hazards models for incident ASCVD and adjusted for traditional risk factors, including age, sex, race, diabetes, systolic blood pressure, smoking, body mass index, total cholesterol level, HDL-C, anti-hypertensive medication, and statin medication.

Models stratified by presence or absence of coronary calcium, family history, or elevated hs-CRP. **CAC:** Coronary artery calcium; **hs-CRP:** High sensitivity C-reactive protein.

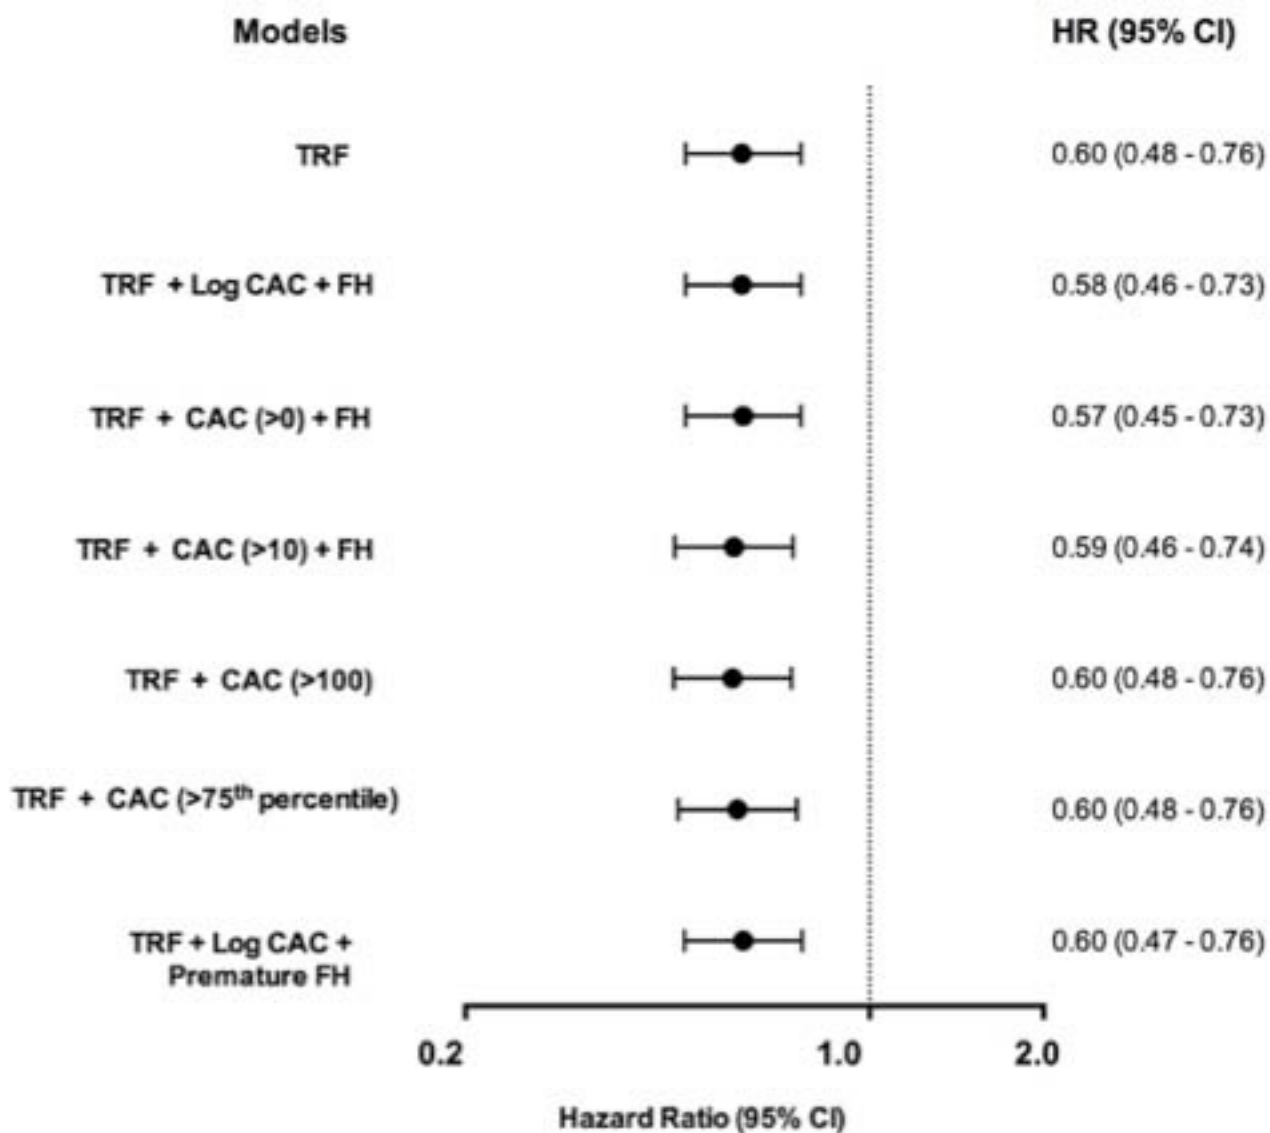

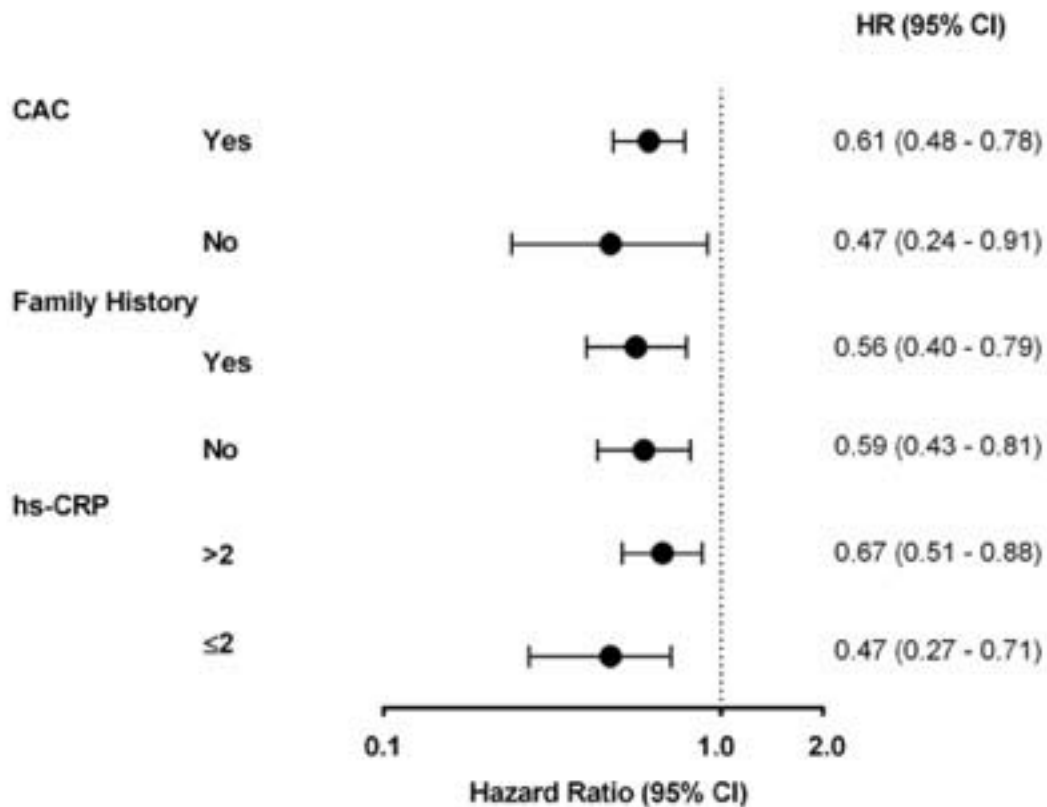

Supplemental Table 1. Net Reclassification of Events and Non-Events with Adding Continuous Cholesterol Efflux to Risk Factors for Incident ASCVD

| <i>Model</i>             |                 | <i>Reclassified Up, %</i> | <i>Reclassified Down, %</i> | <i>NRI</i>         |
|--------------------------|-----------------|---------------------------|-----------------------------|--------------------|
| <i>TRF+CAC+Efflux</i>    | <i>Event</i>    | 65.3                      | 34.4                        | 0.31               |
|                          | <i>Nonevent</i> | 39.7                      | 60.3                        | 0.21               |
|                          | <i>Total</i>    |                           |                             | 0.52 (0.26 – 0.66) |
| <i>TRF+FH+Efflux</i>     | <i>Event</i>    | 65.4                      | 34.4                        | 0.31               |
|                          | <i>Nonevent</i> | 38.4                      | 61.6                        | 0.23               |
|                          | <i>Total</i>    |                           |                             | 0.54 (0.30 – 0.71) |
| <i>TRF+Hs-CRP+Efflux</i> | <i>Event</i>    | 63.3                      | 36.5                        | 0.27               |
|                          | <i>Nonevent</i> | 40.3                      | 59.7                        | 0.20               |
|                          | <i>Total</i>    |                           |                             | 0.46 (0.23 – 0.63) |

Category-less NRI (95%CI) calculated for the addition of continuous efflux to base models: 1) TRF + CAC>0; 2) TRF + FH; 3) TRF + hs-CRP≥2 mg/L. Reclassification separated by those with incident ASCVD and those without incident ASCVD during follow up. NRI = Net Reclassification Index; TRF = Traditional Risk Factors; CAC = Coronary Artery

*Calcium; FH = Family History; hs-CRP = high-sensitivity C-reactive protein*

Supplemental Table 2. Reclassification with Addition of Cholesterol Efflux to Coronary Calcium > 0

| TRF     | TRF+Efflux |       |        |       | Total | ↑ Risk | ↓ Risk | NRI  |
|---------|------------|-------|--------|-------|-------|--------|--------|------|
| +Events | <5%        | 5-7.5 | 7.5-20 | ≥ 20% |       |        |        |      |
| <5%     | 13         | 8     | 0      | 0     | 21    |        |        |      |
| 5-7.5   | 6          | 2     | 7      | 0     | 15    |        |        |      |
| 7.5-20  | 0          | 2     | 23     | 10    | 35    |        |        |      |
| ≥ 20%   | 0          | 0     | 6      | 35    | 41    |        |        |      |
| Total   | 19         | 12    | 36     | 45    | 112   | 24     | 14     | 9.8% |
| -Events | <5%        | 5-7.5 | 7.5-20 | ≥ 20% |       |        |        |      |
| <5%     | 1208       | 70    | 0      | 0     | 1278  |        |        |      |
| 5-7.5   | 88         | 35    | 56     | 0     | 179   |        |        |      |
| 7.5-20  | 1          | 80    | 208    | 36    | 325   |        |        |      |
| ≥ 20%   | 0          | 0     | 17     | 61    | 78    |        |        |      |
| Total   | 1297       | 185   | 281    | 97    | 1860  | 162    | 186    | 1.3% |

---

Total

0.11 (95%CI 0.006-0.22)

NRI

---

Net Reclassification Index (NRI) calculated with the addition of cholesterol efflux > median added to traditional risk factors (TRF: age, sex, race, diabetes, systolic blood pressure, smoking, body mass index, total cholesterol, HDL-C, anti-hypertensive medication status, statin use) + CAC>0. Risk categories of <5%, 5-7.5%, 7.5-20%, and  $\geq$  20% used for groups with events and non-events separately. 95% CI for NRI calculated using boot-strapping.

Supplemental Table 3. Reclassification with Addition of Cholesterol Efflux to Family History

| +Events | TRF+Efflux |       |        |       | Total | ↑ Risk | ↓ Risk | NRI  |
|---------|------------|-------|--------|-------|-------|--------|--------|------|
| TRF     | <5%        | 5-7.5 | 7.5-20 | ≥ 20% |       |        |        |      |
| <5%     | 20         | 5     | 0      | 0     | 25    |        |        |      |
| 5-7.5   | 1          | 3     | 5      | 0     | 9     |        |        |      |
| 7.5-20  | 0          | 6     | 23     | 8     | 37    |        |        |      |
| ≥ 20%   | 0          | 0     | 3      | 38    | 41    |        |        |      |
| Total   | 21         | 14    | 31     | 46    | 112   | 18     | 10     | 7.1% |

| -Events | <5%  | 5-7.5 | 7.5-20 | ≥ 20% |      |     |     |      |
|---------|------|-------|--------|-------|------|-----|-----|------|
| <5%     | 1205 | 85    | 1      | 0     | 1291 |     |     |      |
| 5-7.5   | 89   | 43    | 50     | 0     | 182  |     |     |      |
| 7.5-20  | 0    | 75    | 201    | 32    | 308  |     |     |      |
| ≥ 20%   | 0    | 0     | 21     | 58    | 79   |     |     |      |
| Total   | 1294 | 203   | 273    | 90    | 1860 | 168 | 185 | 0.9% |



---

|       |                         |
|-------|-------------------------|
| Total |                         |
| NRI   | 0.08 (95%CI -0.01-0.18) |

---

Net Reclassification Index (NRI) calculated with the addition of cholesterol efflux > median added to traditional risk factors (TRF: age, sex, race, diabetes, systolic blood pressure, smoking, body mass index, total cholesterol, HDL-C, anti-hypertensive medication status, statin use) + family history (FH). Risk categories of <5%, 5-7.5%, 7.5-20%, and  $\geq$  20% used for groups with events and non-events separately. 95% CI for NRI calculated using boot-strapping.

Supplemental Table 4. Reclassification with Addition of Cholesterol Efflux to Elevated hs-CRP  $\geq 2$  g/L

| +Events     | TRF+Efflux |       |        |             | Total | ↑ Risk | ↓ Risk | NRI   |
|-------------|------------|-------|--------|-------------|-------|--------|--------|-------|
| TRF         | <5%        | 5-7.5 | 7.5-20 | $\geq 20\%$ |       |        |        |       |
| <5%         | 20         | 4     | 0      | 0           | 24    |        |        |       |
| 5-7.5       | 2          | 2     | 8      | 0           | 12    |        |        |       |
| 7.5-20      | 1          | 3     | 25     | 8           | 37    |        |        |       |
| $\geq 20\%$ | 0          | 0     | 1      | 37          | 38    |        |        |       |
| Total       | 23         | 9     | 34     | 45          | 111   | 20     | 7      | 11.7% |

| -Events     | <5%  | 5-7.5 | 7.5-20 | $\geq 20\%$ |      |     |     |      |
|-------------|------|-------|--------|-------------|------|-----|-----|------|
| <5%         | 1203 | 78    | 0      | 0           | 1281 |     |     |      |
| 5-7.5       | 90   | 40    | 56     | 0           | 186  |     |     |      |
| 7.5-20      | 0    | 75    | 206    | 27          | 308  |     |     |      |
| $\geq 20\%$ | 0    | 0     | 17     | 58          | 75   |     |     |      |
| Total       | 1293 | 193   | 279    | 85          | 1850 | 161 | 182 | 1.1% |

---

Total

0.13 (95%CI 0.03-0.22)

NRI

---

Net Reclassification Index (NRI) calculated with the addition of cholesterol efflux > median added to traditional risk factors (TRF: age, sex, race, diabetes, systolic blood pressure, smoking, body mass index, total cholesterol, HDL-C, anti-hypertensive medication status, statin use) + hs-CRP  $\geq$  2 g/L. Risk categories of <5%, 5-7.5%, 7.5-20%, and  $\geq$  20% used for groups with events and non-events separately. 95% CI for NRI calculated using boot-strapping.
